# Supplementary material for: Abundance of Gut Microbiota, Concentration of Short-Chain Fatty Acids, and Inflammatory Markers Associated with Elevated Body Fat, Overweight, and Obesity in Female Adolescents
Source: Mediators Inflamm. 2019 Dec 17;2019:7346863. doi: 10.1155/2019/7346863 (PMC6942879; doi:10.1155/2019/7346863)
Supplement: Supplementary Materials — The supplemental material that was submitted was the database that was used in the data analysis. [file 7346863.f1.xlsx]

## Sheet: Planilha1
Variables	ID_Code	Schools	Sex	Age	Weight	Height	Height (cm)	BMI	BMI_score.z	Nutritional Status (4)	Nutritional Status (3)	Nutritional Status (2)	Waist	Waist class	WHtR	WHtR_class	Neck	Neck_class	DEXA_BF%	DEXA_BF%_class	BF% & BMI class	BPS (mmHg)	BPD (mmHg)	BP class	Cholesterol	Cholesterol class	LDL (mg/dL)	LDL class	VLDL (mg/dL)	TGL (mg/dL)	TGL class	Glicose (mg/dL)	Glicose class	Uric Acid	Uric Acid class	hs-CRP	hs-CRP class	Insulin	Insulin class	HOMA-IR	HOMA-IR class	Insulin (2)	Glicose (2)	Acetic Acid	Propionic Acid	Butyric Acid	Firmicutes	Bacteroidetes	Proteobacterias
118	229	EF_2015.1	2	14	63.65	1.59	159	25177	1.48	2	1	1	76	0	0.48	0	31	0	40.6	3	3	127	90	2	140	1	85.8	0	17.2	86	0	90	0	5.6	0	0.08	0	17.7	1	4.22	1	17.7	97	6	5	0.722	7.07	143.96	2.5
139	244	EF_2015.1	2	15	69.5	1.61	161	268122	1.62	2	1	1	84.5	0	0.52	1	33.5	0	41.5	3	3	115	73.5	0	164	0	100.2	1	14.8	74	0	89	0	5.1	0	0.16	0	21.1	1	4.59	1	19.4	96	6	5	1676	11.3	69.67	0.32
151	256	EF_2015.1	2	14	66.2	1645	164.5	244639	1.28	2	1	1	85.5	0	0.52	1	34	0	35.8	3	3	98	64	0	163	1	88.4	0	33.6	168	1	89	0	6	1	0.7	1	9.5	0	2.27	0	9.7	95	4	3	0.76	3.72	203.7	0.23
168	128	EF_2015.1	2	15	119.35	1654	165.4	436266	4.08	3	2	1	113.3	1	0.69	1	40.5	1	47.3	3	3	165	90	2	183	1	123	1	23	115	1	99	0	4.8	0	1.92	2	45	1	16.99	1	45	153	8	4	1708	13.76	119.31	12.07
178	138	EF_2015.1	2	15	83.2	1684	168.4	293386	2.09	3	2	1	89.75	1	0.53	1	35.75	1	46.4	3	3	112	72.5	0	150	0	79.6	0	13.4	67	0	92	0	4.6	0	0.2	0	10.3	0	2.27	0	10.3	89	7	5	0.795	11.14	141.01	5.21
239	203	EF_2015.1	2	16	71.9	1.66	166	260923	1.42	2	1	1	78.9	0	0.48	0	31.75	0	45.8	3	3	110.5	71	0	197	0	127.8	1	16.2	81	0	97	0	3.9	0	0.21	0	9.7	0	2.89	0	9.7	121	8	5	0.521	10.65	113.94	0.7
246	201	EF_2015.1	2	17	79.05	1.7	170	273529	1.62	2	1	1	89.25	1	0.53	1	35.25	1	41.2	3	3	128.5	92.5	2	153	1	81.8	0	36.2	181	1	90	0	6	1	0.16	0	12.2	0	3.01	0	12.2	100	7	5	2357	7.48	120.86	2.45
258	261	EF_2015.2	2	15	47.5	1622	162.2	180548	-0.99	1	0	0	61	0	0.38	0	27.5	0	27.7	2	1	99	66	0	139	0	76.4	0	13.6	68	0	84	0	2.1	0	0.05	0	4.8	0	0.91	0	4.8	77	3	9	2389	8.5	109.9	6.74
259	260	EF_2015.2	2	16	51.25	1618	161.8	195766	-0.45	1	0	0	67.25	0	0.42	0	30.75	0	27	2	1	103.5	66.5	0	141	0	81	0	13	65	0	98	0	2.9	0	0.02	0	5.2	0	1.14	0	5.2	89	7	8	1167	2.32	94.86	2.24
260	264	EF_2015.2	2	16	40.25	1515	151.5	175364	-1.31	1	0	0	57.25	0	0.38	0	27.75	0	20	1	1	98	65	0	170	0	106.6	1	17.4	87	0	93	0	2.9	0	0.02	0	7.7	0	1.73	0	7.7	91	8	11	0.604	4.26	192.2	0.69
261	265	EF_2015.2	2	15	39.95	1573	157.3	161458	-1.94	1	0	0	55.75	0	0.35	0	27.75	0	20.4	1	1	82	59	0	148	0	75.2	0	24.9	124	1	89	0	2	0	0.22	0	9.6	0	2.11	0	9.6	89	7	3	1	24.24	85.78	3.16
262	263	EF_2015.2	2	15	54.85	1576	157.6	220833	0.55	1	0	0	70.25	0	0.45	0	29.25	0	30.2	3	2	117	69.5	0	111	1	57.4	0	11.6	58	0	93	0	4.6	0	0.07	0	10	0	2.32	0	10	94	9	6	1	11.98	68.52	52.06
263	262	EF_2015.2	2	16	72.7	1808	180.8	222401	0.47	1	0	0	79	0	0.44	0	31.5	0	36.1	3	2	106	77.5	0	131	1	76.8	0	18.2	91	0	86	0	3.6	0	0.28	0	6.1	0	1.35	0	6.1	89	7	25	0.778	8.55	71.52	15.23
264	279	EF_2015.2	2	17	60.6	1613	161.3	232918	0.64	1	0	0	79	0	0.49	0	31	0	33.4	3	2	111.5	66.5	0	140	1	93	0	12	60	0	86	0	2.7	0	0.06	0	4.6	0	0.97	0	4.6	86	9	13	0.585	2.88	126.98	1
265	277	EF_2015.2	2	16	47.6	1577	157.7	191401	-0.61	1	0	0	60.75	0	0.39	0	28.75	0	31.9	3	1	111.5	75	0	140	0	68.8	0	15.2	76	0	87	0	2.3	0	0.07	0	7.6	0	1.64	0	7.6	88	6	5	2784	22.68	137.05	11.79
266	266	EF_2015.2	2	16	48.6	1556	155.6	200732	-0.24	1	0	0	64.75	0	0.42	0	27.5	0	27.5	2	1	112.5	71.5	0	113	0	56.6	0	8.4	42	0	87	0	3.5	0	0	0	8	0	1.97	0	8	100	8	6	0.468	3.36	59.28	2.12
267	269	EF_2015.2	2	16	82.55	1647	164.7	30432	2.23	3	2	1	88.5	1	0.54	1	32	0	48.7	3	3	110.5	85	2	184	1	126.6	1	21.4	107	1	92	0	3.9	0	0.08	0	14.2	0	3.47	1	14.2	99	9	11	0.709	7.15	203	14.5
268	278	EF_2015.2	2	15	57.35	1662	166.2	207621	0.03	1	0	0	70	0	0.42	0	30.75	0	26.8	2	2	99	63.5	0	156	0	88.2	0	11.8	59	0	92	0	3	0	0.03	0	5	0	1.02	0	5	83	6	3	0.789	1.66	166.03	1.12
269	275	EF_2015.2	2	16	54.65	1564	156.4	223417	0.48	1	0	0	65.75	0	0.42	0	27.25	0			2	107.5	71	0	125	0	65.8	0	11.2	56	0	74	0	5.4	0	0.19	0	3.2	0	0.6	0	3.2	75	6	4	1943	5.55	98.82	0.59
270	281	EF_2015.2	2	16	46.1	1.58	158	184666	-0.92	1	0	0	67.5	0	0.43	0	28.25	0	25.7	2	2	103.5	69.5	0	126	1	65.2	0	17.8	89	0	83	0	1.4	0	0.06	0	5.3	0	1.08	0	5.3	83	13	4	0.296	35.19	171.3	5.29
272	273	EF_2015.2	2	15	93.5	1562	156.2	383221	3.32	3	2	1	100.5	1	0.64	1	34	0	56	3	3	120	78	1	121	0	64.4	0	10.6	53	0	84	0	4.6	0	0.35	1	5.6	0	1.12	0	5.6	82	6	10	0.595	20.83	140.4	3.67
274	271	EF_2015.2	2	15	53.5	1555	155.5	221255	0.51	1	0	0	71.5	0	0.46	0	29.5	0	37.2	3	3	103.5	71	0	157	1	103.2	1	15.8	79	0	75	0	4.4	0	0.07	0	5.7	0	1.16	0	5.7	83	7	8	0.571	3.81	112.74	2.22
275	276	EF_2015.2	2	15	49.2	1575	157.5	198337	-0.31	1	0	0	58.5	0	0.37	0	29.5	0	20.9	1	1	126	91.5	2	174	0	105.2	1	11.8	59	0	105	1	3	0	0	0	14.5	0	4.15	1	14.5	116	5	8	1188	2.2	72.63	1.5
276	268	EF_2015.2	2	15	86.3	1728	172.8	289017	2.04	3	2	1	88	1	0.51	1	35	1	36.5	3	3	119	66	0	125	1	86.6	0	11.4	57	0	71	0	4.7	0	0.08	0	7.1	0	1.31	0	7.1	75	4	8	0.783	18.8		17.74
277	272	EF_2015.2	2	18	73.5	1628	162.8	277318	1.63	2	1	1	85	0	0.52	1	35.5	1	38.6	3	2	110.5	74.5	0	175	1	122.6	1	12.4	62	0	95	0	3.9	0	0.45	1	6	0	1.35	0	6	91	9	15	1536	1.15	79.9	0.52
282	285	EF_2015.2	2	15	67.4	1586	158.6	26795	1.62	2	1	1	82.5	0	0.52	1	32	0	49.1	3	3	107.5	69.5	0	160	1	111	1	6	30	0	94	0	2.8	0	0.05	0	6.8	0	1.53	0	6.8	91	11	4	0.431	1.83	128.94	1.13
290	283	EF_2015.2	2	16	63.45	1667	166.7	228329	0.58	1	0	0	70.5	0	0.42	0	31	0	30.9	3	2	116	71.5	0	132	0	71.6	0	13.4	67	0	87	0	3.4	0	0.21	0	19.4	1	4.02	1	19.4	84	6	3	2737	2.01	92.32	0.34
291	294	EF_2015.2	2	16	72.8	1604	160.4	282958	1.89	2	1	1	88.5	1	0.55	1	33	0	44.8	3	3	100	80	1	188	0	121	1	14	70	0	86	0	3.5	0	0.12	0	17.5	1	3.83	1	17.5	89	11	7	1429	9.16	131.04	0.73
295	303	EF_2015.2	2	15	68.65	1605	160.5	266496	1.59	2	1	1	74.25	0	0.46	0	32	0			3	110	70	0	120	0	48.6	0	9.4	47	0	83	0	4.8	0	0.12	0	36.3	1	7.88	1	36.3	88	11	6	1621	5.89	142	1.52
296	297	EF_2015.2	2	16	69.25	1594	159.4	272548	1.69	2	1	1	82	0	0.51	1	31.75	0	43.8	3	3	100	60	0	107	0	47	0	14	70	0	91	0	3.8	0	0.04	0	8.9	0	2.01	0	8.7	94	10	6	0.661	4.94	140.08	4.88
301	296	EF_2015.2	2	15	42.6	1536	153.6	180562	-1.03	1	0	0	60.25	0	0.39	0	27.25	0	30.5	3	2	100	60	0	136	0	68.2	0	8.8	44	0	84	0	2.8	0	0.06	0	2.6	0	0.54	0	2.6	84	4	4	3.19	8		2.69
304	314	EF_2015.2	2	17	68.35	1645	164.5	252585	1.12	2	1	1	81	0	0.49	0	31.5	0	40.2	3	3	110	70	0	131	0	71.6	0	10.4	52	0	84	0	4.6	0	0.06	0	11	0	2.39	0	11	88	11	3	0.735	4.34		14.9
306	306	EF_2015.2	2	17	73.65	1547	154.7	307746	2.24	3	2	1	87.65	0	0.57	1	33.75	0	44	3	3	120	80	1	146	1	93	0	19	95	0	89	0	3.5	0	0.19	0	16.9	1	3.87	1	16.9	93	9	6	1642	5.92		2
307	308	EF_2015.2	2	15	63.65	1694	169.4	221805	0.6	1	0	0	78.5	0	0.46	0	30.5	0	34	3	2	110	70	0	120	1	63.8	0	18.2	91	0	87	0	4	0	0.05	0	7.7	0	1.88	0	7.7	99	5	21	1.9	19.81		2.83
308	313	EF_2015.2	2	15	65.85	1565	156.5	268861	1.64	2	1	1	79	0	0.5	1	33	0	39.1	3	3	110	70	0	148	0	88.4	0	13.6	68	0	90	0	3.9	0	0.02	0	17.5	1	4.05	1	17.5	94	9	9	4	2.66	83.01	0.6
314	317	EF_2015.2	2	17	58.2	1678	167.8	206699	-0.14	1	0	0	69.75	0	0.42	0	30.75	0	28.8	2	1	103.5	72.5	0	166	0	91.4	0	9.6	48	0	80	0	3.4	0	0.18	0	5.6	0	1.22	0	5.6	88	7	8	1122	11.67	76.09	3.15
315	318	EF_2015.2	2	17	79	1669	166.9	283605	1.8	2	1	1	96.25	1	0.58	1	35.75	1	48.1	3	3	1293333	796667	0	172	1	120.6	1	17.4	87	0	81	0	6.1	1	0.04	0	21.6	1	4.68	1	21.6	88	7	5	2116	29.23	128.7	7.15
317	325	EF_2015.2	2	19	50.55	1669	166.9	181472		0	0	0	69.5	0	0.42	0	29.5	0	25	2	2	95.5	63	0	133	0	64	0	11	55	0	79	0	3.6	0	0.16	0	2.1	0	0.42	0	2.1	83	9	8	0.5	6.03	66.91	2.33
319	323	EF_2015.2	2	17	55.5	1611	161.1	213846	0.06	1	0	0	66	0	0.41	0	29	0	31.9	3	1	105.5	75	0	148	0	85.2	0	16.8	84	0	73	0	3.3	0	0.45	1	4.7	0	0.8	0	4.2	77	10	5	0.678	4.41	135	39.34
320	322	EF_2015.2	2	18	64.55	1586	158.6	25662	1.2	2	1	1	77.25	0	0.49	0	30	0	37	3	3	105	72	0	149	1	88	0	17	85	0	82	0	3.6	0	0.04	0	3.3	0	0.69	0	3.3	85	10	5	0.525	10.41	122.26	2.9
321	319	EF_2015.2	2	17	39.4	1532	153.2	167872	-1.79	1	0	0	54.5	0	0.36	0	27	0	28	2	1	89	68	0	178	0	109	1	21	105	1	77	0	3.1	0	0.08	0	1.9	0	0.37	0	1.9	81	8	5	0.458	1.71	216.32	4.41
322	320	EF_2015.2	2	17	46	1593	159.3	18127	-1.14	1	0	0	61.5	0	0.39	0	27.75	0	26.1	2	1	109.5	71	0	137	1	74.4	0	25.6	128	1	86	0	2.5	0	0.03	0	8.9	0	1.95	0	8.9	89	11	5	0.833	2.76	138.05	3.55
323	332	EF_2015.2	2	16	65.95	1617	161.7	252229	1.19	2	1	1	74.5	0	0.46	0	34.5	1	30.6	3	3	104.5	65	0	163	0	94.4	0	12.6	63	0	85	0	3.6	0	0.04	0	4.1	0	1.05	0	3.9	110	10	16	1302	5.51	210.87	2.52
325	333	EF_2015.2	2	15	48.2	1.59	159	190657	-0.71	1	0	0	62.5	0	0.39	0	29.75	0	24.8	1	1	98.5	64.5	0	146	1	86	0	20	100	1	88	0	3.1	0	0.05	0	7.7	0	1.65	0	7.7	87	8	10	0.717	4.99	93.82	13.5
326	334	EF_2015.2	2	17	43.3	1507	150.7	190661	-0.73	1	0	0	62.5	0	0.41	0	28	0	25.2	2	1	109	65.5	0	91	1	53.2	0	9.8	49	0	76	0	4.1	0	0.67	1	5	0	0.97	0	5	79	8	4	1543	1.02	78.65	2.47
328	335	EF_2015.2	2	16	51.9	1582	158.2	207374	-0.05	1	0	0	63	0	0.4	0	30.5	0	24.6	1	1	100	64	0	162	1	117	1	14	70	0	64	0	1.9	0	0.38	1	1.9	0	0.31	0	1.9	66	12	15	0.528	1.43	156.48	1.81
329	331	EF_2015.2	2	16	66.15	1584	158.4	263645	1.44	2	1	1	80.25	0	0.51	1	32.75	0	33.9	3	3	115.5	66.5	0	146	0	70.8	0	17.2	86	0	84	0	3.2	0	0.02	0	6.1	0	1.27	0	6.1	84	7	7	0.773	2.85	56.03	2.42
333	336	EF_2015.2	2	16	57.25	1687	168.7	201162	-0.29	1	0	0	70	0	0.41	0	30	0	28.1	2	1	107	76.5	0	140	0	77	0	12	60	0	78	0	2.6	0	0.09	0	14.7	0	3.16	1	14.7	87	9	5	0.964	14.33	134.5	2.84
334	343	EF_2015.2	2	17	57.5	1501	150.1	255215	1.22	2	1	1	74	0	0.49	0	31	0	37.1	3	3	123	90.5	2	199	1	144.2	1	10.8	54	0	84	0			0.1	0	8.9	0	1.8	0	8.9	82	10	9	0.379	2.01	89.61	2.85
335	339	EF_2015.2	2	17	52.25	1572	157.2	211437	0.03	1	0	0	65.25	0	0.42	0	30	0	24.7	1	1	116	71	0	108	1	63.6	0	13.4	67	0	81	0	3.3	0	0.18	0	6.9	0	1.39	0	6.9	82	5	9	1933	5.62	149.85	3.8
336	338	EF_2015.2	2	16	61.5	1601	160.1	239934	0.95	1	0	0	77.5	0	0.48	0	30	0	42.2	3	2	119	77.5	0	160	1	85.6	0	42.4	212	1	88	0	4.7	0	0.41	1	11.8	0	2.44	0	11.8	84	6	16	3763	3.95	147.6	15.86
337	337	EF_2015.2	2	16	69.9	1525	152.5	300564	2.14	3	2	1	80.75	0	0.53	1	33	0	40.2	3	3	108	73.5	0	105	1	56	0	11	55	0	94	0	3.8	0	0.29	0	9	0	2.01	0	9	91	6	7	1526	1.61	135.15	1.03
338	342	EF_2015.2	2	15	47.5	1682	168.2	167896	-1.64	1	0	0	67.25	0	0.4	0	28	0	28.5	2	1	99	62.5	0	151	0	69.2	0	27.8	139	1	85	0	2.4	0	0.02	0	7.8	0	1.61	0	7.8	84	11	11	0.641	2.27	113.85	3.26
339	341	EF_2015.2	2	16	55.1	1669	166.9	197806	-0.43	1	0	0	65	0	0.39	0	29.5	0	28.5	2	1	133	80	1	156	0	91.2	0	13.8	69	0	84	0	3.4	0	0.05	0	6.3	0	1.34	0	6.3	86	9	5	1245	0.6	30.7	0.72
341	349	EF_2015.2	2	17	69.4	1713	171.3	236507	0.73	1	0	0	74.5	0	0.43	0	31.25	0	40.5	3	2	129	86.5	2	155	1	85.2	0	27.8	139	1	90	0	4.4	0	0.17	0	6.6	0	1.45	0	6.6	89	6	4	1108	5.97	124.4	5.94
342	348	EF_2015.2	2	17	55.9	1669	166.9	200678	-0.4	1	0	0	68.5	0	0.41	0	30.5	0	30.4	3	2	110.5	73.5	0	167	0	110.6	1	10.4	52	0	90	0	2.8	0	0.15	0	7.2	0	1.32	0	6.4	84	6	8	0.889	3.38	79.49	6.05
343	353	EF_2015.2	2	18	65.2	1655	165.5	238041	0.72	1	0	0	78.5	0	0.47	0	31	0			3	119	80	0	134	0	71.8	0	16.2	81	0	98	0	4.1	0	0.45	1	11.1	0	2.44	0	11.1	89	7	4	2091	1.61	113.21	1.34
344	347	EF_2015.2	2	16	69.5	1678	167.8	246832	1.07	2	1	1	83	0	0.49	0	32.5	0	39.8	3	3	111.5	78	0	116	0	59.6	0	8.4	42	0	85	0	3.6	0	0.06	0	7.9	0	1.3	0	7.9	78	10	10	1183	2.37		5.96
345	358	EF_2015.2	2	17	59.2	1563	156.3	242328	0.92	1	0	0	78	0	0.5	1	29.75	0	41.7	3	2	98.5	66	0	114	1	66	0	12	60	0	87	0	3	0	0.13	0	7	0	1.53	0	7	89	9	9	1554	4.4	63.05	0.73
346	359	EF_2015.2	2	17	57.3	1643	164.3	212266	0.05	1	0	0	68.5	0	0.42	0	29	0	39.5	3	2	100	68.7	0	144	0	82	0	9	45	0	68	0	4.2	0	0.17	0	5.4	0	1.04	0	5.4	78	9	3	0.462	1.81	62.85	0.88
347	346	EF_2015.2	2	17	74.35	1602	160.2	289705	1.93	2	1	1	87.75	0	0.55	1	31	0	49	3	3	100.5	73	0	143	0	65.2	0	10.8	54	0	88	0	7.1	1	0.25	0	6.2	0	1.28	0	6.2	84	8	6	1.74	3.04	44.53	2.54
348	344	EF_2015.2	2	16	69.55	1.7	170	240657	0.92	1	0	0	76	0	0.45	0	32	0	36.9	3	2	112.5	75.5	0	117	1	66.2	0	11.8	59	0	92	0	3.1	0	0.03	0	13.6	0	2.95	0	13.6	88	10	7	0.75	2	90.96	0.76
349	352	EF_2015.2	2	17	49.25	1659	165.9	178942	-1.24	1	0	0	65.25	0	0.39	0	27.9	0	30.9	3	2	105.5	66	0	156	0	77.4	0	15.6	78	0	90	0	5	0	0	0	3.7	0	0.85	0	3.7	93	12	6	0.514	1.28	114.94	1.92
351	355	EF_2015.2	2	17	60.35	1.63	163	227144	0.49	1	0	0	70.5	0	0.43	0	29.25	0	38.7	3	2	116	74.5	0	152	0	77.2	0	10.8	54	0	90	0	3.9	0	0.4	1	7.3	0	1.51	0	7.3	84	6	8	2	2.11	65.07	3.27
352	350	EF_2015.2	2	17	48.3	1562	156.2	197963	-0.47	1	0	0	65	0	0.42	0	29.5	0	27.3	2	1	106.5	67	0	155	0	96	0	14	70	0	88	0	2.7	0	0.06	0	5.2	0	0.94	0	4.3	88	10	5	4729	3.92	163.76	1.46
353	351	EF_2015.2	2	16	77.85	1.67	167	279142	1.79	2	1	1	84.75	0	0.51	1	32.25	0	41.2	3	3	122.5	79.5	0	133	1	78.6	0	16.4	82	0	86	0	3.1	0	0.04	0	9.2	0	1.88	0	9.2	83	6	9	1212	1.25	94.24	0.71
354	345	EF_2015.2	2	16	47.8	1602	160.2	186253	-0.85	1	0	0	63.25	0	0.39	0	29	0	21.7	1	1	118	81	1	136	1	82.6	0	9.4	47	0	97	0	3.4	0	0.42	1	5.6	0	1.25	0	5.6	90	12	4	0.444	2.33	111.49	4.26
356	371	EF_2015.2	2	16	58.55	1737	173.7	194056	-0.52	1	0	0	71.75	0	0.41	0	31.5	0	22	1	1	113	68.5	0	144	1	82.8	0	18.2	91	0	88	0	2.6	0	0.03	0	5.9	0	1.24	0	5.9	85	12	8	0.903	3.12	158.62	2.17
357	367	EF_2015.2	2	16	51.1	1722	172.2	172328	-1.52	1	0	0	68.5	0	0.4	0	29.5	0	23.9	1	1	106	73	0	123	1	69.8	0	10.2	51	0	77	0	2.9	0	0.02	0	4.5	0	0.76	0	4.2	74	8	7	2469	3.6	111.13	7.76
358	362	EF_2015.2	2	17	56.7	1.66	166	205763	-0.18	1	0	0	72.5	0	0.44	0	29.25	0	30.2	3	2	108.5	70	0	142	1	84.4	0	14.6	73	0	84	0	3.1	0	0.02	0	7.2	0	1.4	0	6.8	84	7	11	2.6	6.18	166.79	1.01
359	372	EF_2015.2	2	16	59.05	1.69	169	20675	-0.12	1	0	0	69	0	0.41	0	30	0	32.3	3	2	98.5	65.5	0	168	1	118	1	12	60	0	97	0	2.6	0	0.06	0	8.2	0	1.85	0	8.2	91	10	5	0.931	4.26	133.17	10.93
361	361	EF_2015.2	2	16	54.2	1.64	164	201517	-0.3	1	0	0	70.5	0	0.43	0	30.5	0	27	2	1	104	72.5	0	140	1	84.2	0	14.8	74	0	80	0	3	0	0.1	0	6.9	0	1.24	0	6	83	4	4	4846	10.14	100.96	64
362	365	EF_2015.2	2	16	53.35	1.63	163	200798	-0.33	1	0	0	69.75	0	0.43	0	30	0	26.4	2	1	117	77	0	142	0	75.6	0	10.4	52	0	80	0	2.4	0	0.17	0	6.7	0	1.36	0	6.7	82	9	7	0.927	5.8	131.37	0.66
363	364	EF_2015.2	2	16	49.2	1659	165.9	178761	-1.23	1	0	0	63.25	0	0.38	0	29.25	0	16.7	1	1	100	63	0	136	0	63.2	0	8.8	44	0	83	0	3	0	0.04	0	4	0	0.8	0	4	80	9	5	0.821	18.64	151	23.72
364	366	EF_2015.2	2	16	46.55	1.58	158	186469	-0.89	1	0	0	63.25	0	0.4	0	29	0	28.1	2	1	108.5	77.5	0	157	0	84.6	0	15.4	77	0	84	0	3.8	0	0.06	0	4.3	0	1.04	0	4.8	88	13	6	2.81	6.11	112.07	4.31
365	363	EF_2015.2	2	17	53.75	1594	159.4	211545	0.03	1	0	0	68.5	0	0.43	0	29.25	0	34.7	3	2	104.5	66	0	206	0	87	0	19	95	0	82	0	2.5	0	0.37	1	4.8	0	1.01	0	5.3	77	8	4	2348	2.55		2.12
366	369	EF_2015.2	2	16	54.85	1517	151.7	238345	0.87	1	0	0	65.75	0	0.43	0	30.75	0	29.7	2	1	112.5	56.5	0	120	1	68.4	0	12.6	63	0	96	0	2.3	0	0.1	0	8.1	0	1.74	0	7.1	99	7	5	2.4	17.63		4.25
367	370	EF_2015.2	2	16	53.6	1585	158.5	213357	0.14	1	0	0	66.75	0	0.42	0	29	0	30.4	3	2	111	67.5	0	160	0	71.4	0	11.6	58	0	86	0	3.5	0	0.07	0	3.7	0	0.77	0	3.7	83	9	4	0.536	2.84	88.82	21.5
368	360	EF_2015.2	2	17	43.25	1584	158.4	172376	-1.55	1	0	0	59.5	0	0.38	0	28.25	0	22.8	1	1	117.5	80	1	117	0	57.6	0	7.4	37	0	82	0	2.3	0	0.12	0	5.6	0	1.1	0	5.4	83	4	8	1462	7.68		6.63
369	379	EF_2015.2	2	18	49	1585	158.5	195046	-0.66	1	0	0	67.75	0	0.43	0	29.5	0	26.3	2	1	110.5	68	0	184	1	133	1	17	85	0	87	0	3	0	0.06	0	7.9	0	1.78	0	7.9	91	9	5	0.451	0.37	188.68	1.86
372	376	EF_2015.2	2	16	59.7	1623	162.3	22664	0.53	1	0	0	78.5	0	0.48	0	31.75	0	31.8	3	2	106	76	0	123	1	62.4	0	21.6	108	1	85	0	3.1	0	0.06	0	7.1	0	1.79	0	7.1	102	8	5	1041	1.88	115.5	1.67
375	377	EF_2015.2	2	17	47.95	1615	161.5	183842	-1.04	1	0	0	62.75	0	0.39	0	29	0	27	2	1	108.5	75.5	0	178	0	115.6	1	9.4	47	0	80	0	3.2	0	0.02	0	3	0	0.58	0	3	79	8	4	1723	3.93	135.8	0.76
377	387	EF_2015.2	2	17	74.95	1645	164.5	276975	1.66	2	1	1	79.5	0	0.48	0	30	0	40.5	3	3	102	64.5	0	176	0	95.2	0	6.8	34	0	78	0	3.7	0	0.02	0	3.6	0	0.7	0	3.6	78	7	11	1463	2.51	88.59	6.1
381	381	EF_2015.2	2	16	52.9	1.64	164	196684	-0.48	1	0	0	72.25	0	0.44	0	29.75	0	34.5	3	2	116.5	75	0	148	1	95.4	0	17.6	88	0	87	0	4.1	0	0.04	0	4.4	0	0.94	0	4.4	87	8	9	0.625	2.31		1.94
384	388	EF_2015.2	2	17	44.35	1549	154.9	184838	-1	1	0	0	61	0	0.39	0	30.25	0	20.4	1	1	116.5	77.5	0	131	0	58.8	0	12.2	61	0	81	0	4	0	0.04	0	5.2	0	1.09	0	5.2	86	5	5	1182	6.72	232.96	23.24
386	399	EF_2015.2	2	17	70.5	1632	163.2	264697	1.41	2	1	1	82.75	0	0.51	1	33.5	0	44.2	3	3	113.5	76	0	112	1	58	0	11	55	0	81	0	4.4	0	0.1	0	10.3	0	2.04	0	10.3	80	10	13	0.661	2.22	100.3	1.12
387	394	EF_2015.2	2	18	54.6	1562	156.2	223785	0.33	1	0	0	69.75	0	0.45	0	30.25	0	32.1	3	2	109	70.5	0	129	1	73.6	0	15.4	77	0	88	0	3.4	0	0.16	0	4.2	0	0.87	0	4.2	84	9	3	0.537	1.07	107.03	1.42
388	396	EF_2015.2	2	19	65.6	1557	155.7	270599		2	1	1	79.5	0	0.51	1	28.75	0	36.4	3	3	120.5	82	0	166	0	78.6	0	9.4	47	0	90	0	5.3	0	0.02	0	3.1	0	0.64	0	3.1	84	7	6	1286	6.39	88.38	3.3
391	397	EF_2015.2	2	17	56.85	1516	151.6	247361	0.99	1	0	0	73.75	0	0.49	0	30.3	0	38.8	3	2	110.5	82	2	150	0	76.4	0	9.6	48	0	81	0	2.9	0	0.15	0	8.9	0	1.93	0	8.9	88	5	9	1323	1.11	121.87	0.75
395	395	EF_2015.2	2	17	55.35	1578	157.8	222282	0.37	1	0	0	73	0	0.46	0	32	0	30.8	3	2	111	75	0	120	0	52.6	0	8.4	42	0	84	0	3.1	0	0.14	0	5.3	0	1.07	0	5.3	82	10	4	0.379	0.6	186.61	1.2
398	406	EF_2015.2	2	17	52.3	1519	151.9	226666	0.47	1	0	0	68	0	0.45	0	31	0	31.1	3	2	80	60	0	153	1	96	0	14	70	0	64	0	4.4	0	0.08	0	9.9	0	1.76	0	9.9	72	5	4	1152	7.77	106.72	7.43
399	405	EF_2015.2	2	16	57.5	1614	161.4	22073	0.34	1	0	0	67.25	0	0.42	0	29	0	31.8	3	2	120	80	1	118	0	64.2	0	8.8	44	0	85	0	4	0	0.06	0	3.8	0	0.76	0	3.8	81	13	3	0.7	6.22		18.11
400	402	EF_2015.2	2	19	99.45	1644	164.4	36796		3	2	1	113	1	0.69	1	37	1	51.3	3	3	120	80	0	162	0	98.2	0	8.8	44	0	80	0	5.6	0	0.83	1	19.2	1	3.88	1	19.2	82	6	10	0.943	11.45	232.98	3.15
401	401	EF_2015.2	2	17	65.2	1616	161.6	249669	1.08	2	1	1	74.25	0	0.46	0	30.25	0	38.5	3	3	110	80	1	164	0	102	1	12	60	0	77	0	3	0	0.02	0	6.1	0	1.15	0	6.1	76	7	5	2561	4.62	168.27	0.93
402	403	EF_2015.2	2	17	55.05	1606	160.6	213435	0.03	1	0	0	67.5	0	0.42	0	30.65	0	32.5	3	2				173	0	104.4	1	16.6	83	0	81	0	3.4	0	0.03	0	2.9	0	0.59	0	2.9	83	10	3	0.754	11.61		1.99
404	400	EF_2015.2	2	17	62.15	1.61	161	239767	0.85	1	0	0	75.5	0	0.47	0	31.25	0	39.7	3	2				120	1	70.4	0	12.6	63	0	83	0	4.3	0	0.08	0	2.3	0	0.47	0	2.3	84	11	3	3092	14.17	222.18	2.95
[truncated: 8 more columns]
